# Supplementary material for: Low-memory, small sample size, accurate and high-precision determinations of lithium isotopic ratios in natural materials by MC-ICP-MS
Source: Royal Society of Chemistry journal article supplement (doi:10.1039/b926327f), 2010-01-01
Supplement: b926327f.pdf [file b926327f.pdf]

Electronic Supplementary Information (ESI): Fig. S1 and Table S1

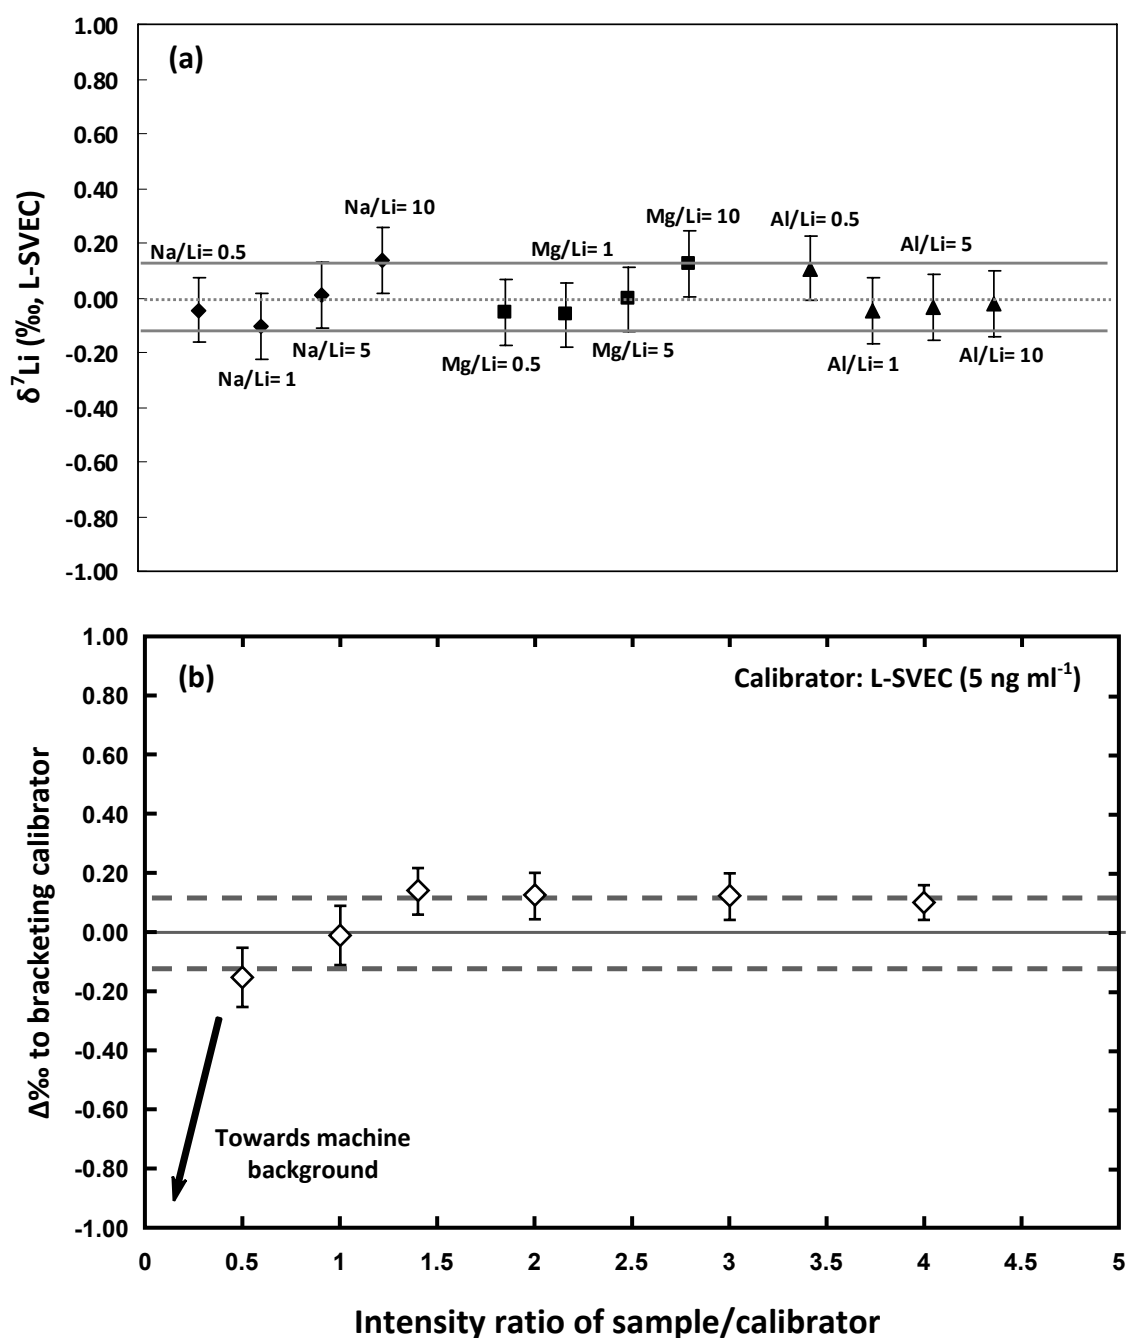

Fig. S1 (a) The matrix effects of elements. L-SVEC standard solution doped with Na (diamonds), Mg (squares) and Al (triangles) are compared with pure L-SVEC solution. The result indicates that the influence of matrix effect for a wide range of element/Li ratio using the analytical method presented here is negligible. (b) Intensity-dependent instrumental shift of measured Li isotope ratios using an APEX-IR desolvating system for sample introduction. 2.5-20 ng ml<sup>-1</sup> L-SVEC solutions were bracketed with 5 ng ml<sup>-1</sup> solution using the on-peak blank correction. The mean value of  $\delta^7\text{Li}$  and the error bars (2SD) were also shown. Symbols represent mean values of at least five duplicates.

Table S1. Comparison of the  $\delta^7\text{Li}$  values of this study with published work

| Reference                            | Sample                                    | Analytical method                        | Li amount required | $\delta^7\text{Li}$ (‰) | Uncertainty (2SD) | N         | $\pm 2\text{SE}$ |
|--------------------------------------|-------------------------------------------|------------------------------------------|--------------------|-------------------------|-------------------|-----------|------------------|
| <i>Chan</i> (1987)                   | Seawater                                  | TIMS / $\text{Li}_2\text{B}_4\text{O}_7$ | 3.5 $\mu\text{g}$  | 33.3                    | 1.2               | 5         | 0.5              |
| <i>You and Chan</i> (1996)           | Atlantic                                  | TIMS / $\text{Li}_3\text{PO}_4$          | 100 ng             | 32.4                    | 2.6               | 6         | 1.1              |
| <i>Moriguti and Nakamura</i> (1998)  | Pacific                                   | TIMS / $\text{Li}_3\text{PO}_4$          | 100 ng             | 30.0                    | 0.7               | 5         | 0.3              |
| <i>James and Palmer</i> (2000)       | Seawater                                  | TIMS / $\text{Li}_3\text{PO}_4$          | 100 ng             | 32.5                    | 1.6               | 7         | 0.6              |
| <i>Tomascak et al.</i> (1999)        | Pacific                                   | MC-ICP-MS / Plasma 54                    | 40 ng              | 31.8                    | 1.9               | 15        | 0.5              |
| <i>Nishio and Nakai</i> (2002)       | Pacific                                   | MC-ICP-MS / IsoProbe                     | 45 ng              | 29.3                    | 0.9               | 3         | 0.5              |
| <i>Pistiner and Henderson</i> (2003) | Seawater                                  | MC-ICP-MS / Nu Plasma                    | 15 ng              | 29.6                    | 0.4-0.9           | 2         | 0.3-0.6          |
| <i>Bryant et al.</i> (2003)          | Pacific                                   | MC-ICP-MS / Neptune / SIS                | 25-40 ng           | 30.4-32.0               | 0.2-0.9           | 18        | 0.1-0.3          |
| <i>Millot et al.</i> (2004)          | Atlantic (BCR-403)                        | MC-ICP-MS / Nu Plasma / Aridus           | 3-15 ng            | 31.2                    | 1.8               | 28        | 0.3              |
|                                      |                                           | MC-ICP-MS / Neptune / SIS                | 15-20 ng           | 31.0                    | 0.5               | 31        | 0.1              |
| <i>Jeffcoate et al.</i> (2004)       | Pacific, Atlantic, Mediteranean Sea       | MC-ICP-MS / Neptune / Aridus             | 2 ng               | 31.1                    | 0.2               | 31        | 0.05             |
| <i>Rosner et al.</i> (2007)          | Pacific                                   | MC-ICP-MS / Neptune / SIS                | 3-30 ng            | 30.86                   | 0.27              | 2         | 0.19             |
|                                      | Atlantic (IAPSO)                          |                                          |                    | 30.84                   | 0.19              | 3         | 0.11             |
|                                      | Atlantic (NASS-5)                         |                                          |                    | 30.63                   | 0.44              | 3         | 0.25             |
| <b>This study</b>                    | <b>Atlantic (IAPSO, S= 35‰)</b>           | <b>MC-ICP-MS / Neptune / APEX-IR</b>     | <b>1.2 ng</b>      | <b>30.88</b>            | <b>0.12</b>       | <b>46</b> | <b>0.02</b>      |
|                                      | <b>Atlantic (NASS-5, S= 30.4‰)</b>        |                                          |                    | <b>30.73</b>            | <b>0.15</b>       | <b>10</b> | <b>0.05</b>      |
|                                      | <b>Halifax harbour (CASS-4, S= 30.7‰)</b> |                                          |                    | <b>30.69</b>            | <b>0.12</b>       | <b>4</b>  | <b>0.06</b>      |
|                                      | <b>San Francisco Bay (SLEW-3, S= 15‰)</b> |                                          |                    | <b>30.45</b>            | <b>0.09</b>       | <b>5</b>  | <b>0.04</b>      |
| <b>This study</b>                    | <b>NIST SRM 1640</b>                      | <b>MC-ICP-MS / Neptune / APEX-IR</b>     | <b>1.2 ng</b>      | <b>9.36</b>             | <b>0.16</b>       | <b>8</b>  | <b>0.06</b>      |
| <b>This study</b>                    | <b>JCp-1</b>                              | <b>MC-ICP-MS / Neptune / APEX-IR</b>     | <b>1.2 ng</b>      | <b>20.16</b>            | <b>0.20</b>       | <b>5</b>  | <b>0.09</b>      |
| <i>Magna et al.</i> (2004)           | AGV-2                                     | MC-ICP-MS / Nu Plasma / Aridus           | 5 ng               | 7.94                    | 0.64              | 6         | 0.26             |
| <b>This study</b>                    | <b>AGV-2</b>                              | <b>MC-ICP-MS / Neptune / APEX-IR</b>     | <b>1.2 ng</b>      | <b>7.98</b>             | <b>0.19</b>       | <b>5</b>  | <b>0.08</b>      |
| <i>Zack et al.</i> (2003)            | BHVO-2                                    | MC-ICP-MS / Nu Plasma / Aridus           |                    | 4.5                     | 1                 |           |                  |
| <i>Magna et al.</i> (2004)           | BHVO-2                                    | MC-ICP-MS / Nu Plasma / Aridus           | 5 ng               | 4.55                    | 0.29              | 8         | 0.10             |
| <b>This study</b>                    | <b>BHVO-2</b>                             | <b>MC-ICP-MS / Neptune / APEX-IR</b>     | <b>1.2 ng</b>      | <b>4.63</b>             | <b>0.16</b>       | <b>5</b>  | <b>0.07</b>      |

2SE = 2SD/ $\sqrt{n}$

SIS= Stable Introduction System
